# Supplementary material for: A Theoretical Study of the Insertion of Atoms and Ions into Titanosilsequioxane (Ti-POSS) in Comparison with POSS
Source: Hindawi journal article supplement (doi:10.1155/2012/391325), 2012-01-01
Supplement: f1 [file 391325.f1.pdf]

## **Supporting Information**

# **A Theoretical Study of the Insertion of Atoms and Ions into Titanosilsequioxane (Ti-POSS) in Comparison with POSS**

**Yosuke Komagata, Takaaki Iimura, Nobuhiro Shima and Takako Kudo**

Department of Chemistry and Chemical Biology, Graduate School of Engineering, Gunma University, 1-5-1 Tenjin-cho, Kiryu 376-8515, Japan

Correspondence should be addressed to Takako Kudo, [tkudo@gunma-u.ac.jp](mailto:tkudo@gunma-u.ac.jp)

### **Contents**

- 1. Cage Effect in  $F^-@T_n$  (n=8 and 10)**
- 2. Figures S1-S3**
- 3. Tables S1 and S2**

## 1. Cage Effect in $F^-@T_n$ (n=8 and 10)

In order to understand the endohedral complex of  $F^-$  and  $Ti-T_8$  (“endo” (e)) more deeply, we have investigated “cage effect” by comparison of the exohedral and endohedral complexes of  $Ti-T_n$  (n=8 and 10) with those with the model compound  $FH(TiOH)_3^-$  as shown in Figure S3. The geometrical parameters and the relative energies of the three types of complexes are depicted in Table S2. The “equatorial” is least stable in all cases and it disappeared at the B3LYP level for  $FH(TiOH)_3^-$  and  $F^-(Ti-T_{10})$  but the relative stability between “axial” and “endo” is not regular. The stability of “endo” structure is larger in the cage compounds (especially in  $Ti-T_8$ ) than in  $FH(TiOH)_3^-$ . This may be just a “cage effect”. Here, it may be worth to examine the effect in more detail. For “endo” structure, the averaged distance between  $F^-$  and skeletal Ti atoms (see Table S2) in  $T_8$  is shorter than that in  $T_{10}$  as expected. In spite of the shorter  $r(F^-Ti)_{ave}$ , however, the absolute value of the interaction energy ( $\Delta E_{int}$ ) of “endo” in  $F^-@Ti-T_8$  is rather smaller than that in  $F^-@Ti-T_{10}$ , which is also true for the other isomers as shown in Tables 6 and S1. This seems to cause the larger absolute value of the binding energy ( $\Delta E_{comp}$ ) of the isomers of  $Ti-T_{10}$  compared to those of  $Ti-T_8$  except for the “endo”. On the other hand,  $\Delta E_{def}$  is slightly larger in  $Ti-T_{10}$  compared with that in  $Ti-T_8$ . These results seem to indicate the significant softness of the  $Ti-T_n$  with larger cage, which allows the strong interaction with the guest species accompanying the local deformation of the cage. The smaller  $\Delta E_{def}$  in “endo” of  $Ti-T_8$  than that in  $Ti-T_{10}$  seems to make the structure most stable among the isomers in the former.

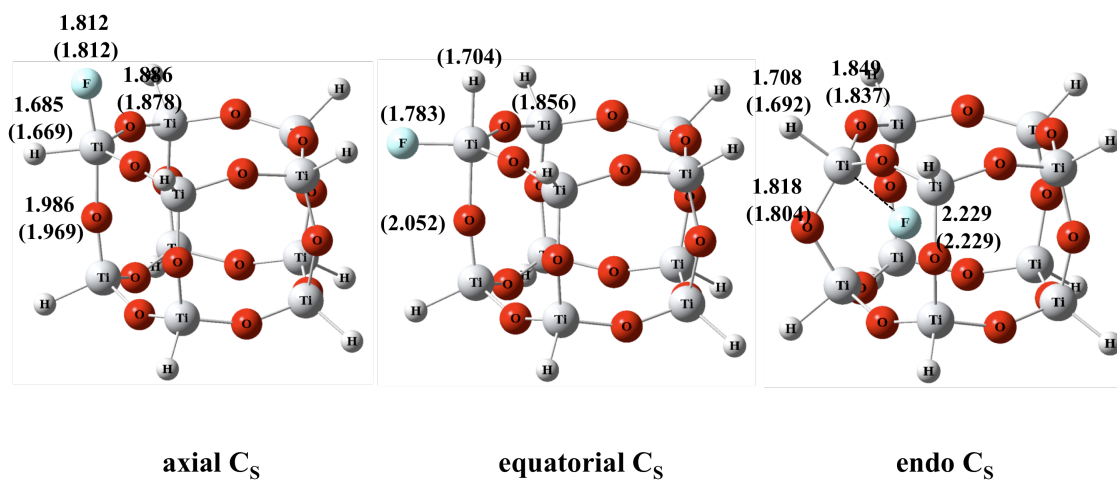

**Figure S1:** The B3LYP/6-311+G(d) and HF/6-311+G(d) (in parentheses) optimized geometries of two types of the exohedral (“axial” and “equatorial”) and endohedral (“endo”) complexes of  $\text{F}^-$  and  $\text{Ti-T}_{10}$  in angstroms.

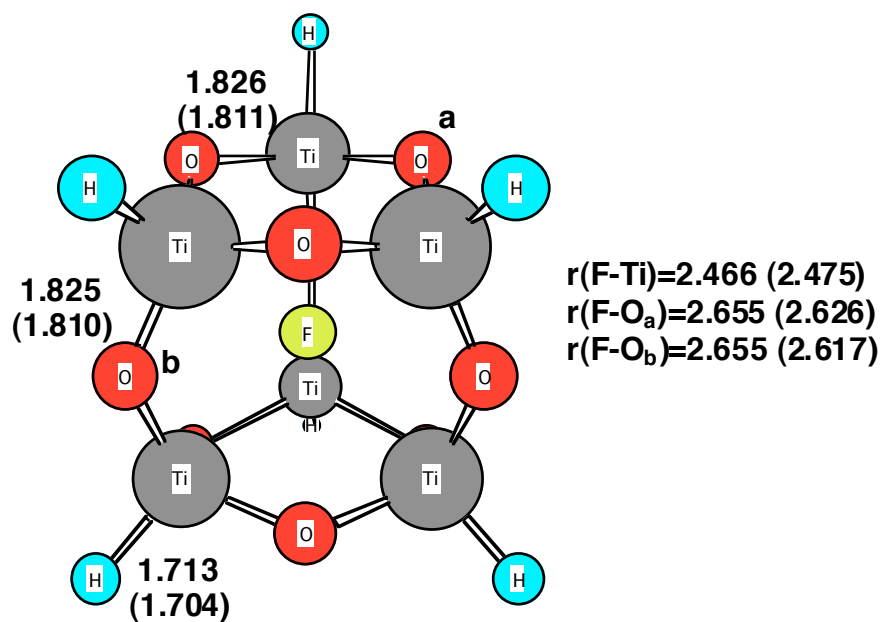

**Figure S2:** The B3LYP/6-311+G(d) and HF/6-311+G(d) (in parentheses) optimized geometries of the endohedral complex ( $D_{3h}$ ) of  $\text{F}^-$  and  $\text{Ti-T}_6$  in angstroms.

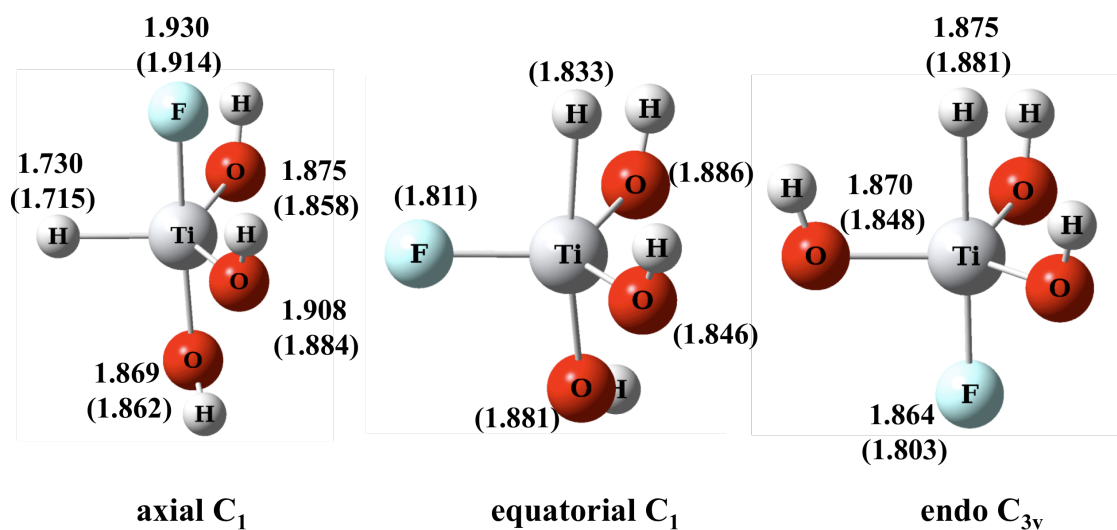

**Figure S3:** The B3LYP/6-311+G(d) and HF/6-311+G(d) (in parentheses) optimized geometries of three isomers of the model compound,  $\text{FHTi}(\text{OH})_3^-$  in angstroms.

**TABLE S1:** Energy decomposition of the binding energy ( $\Delta E_{\text{comp}}$ ) (kcal/mol) of the complexes of  $\text{F}^-$  and  $\text{Ti-T}_8/\text{Ti-T}_{10}$  and the energies relative to “axial” ( $\Delta E$ ) in each system based on the B3LYP/6-311+G(d)+ZPC, MP2/6-311+G(d)//B3LYP/6-311+G(d)<sup>a</sup> and B3LYP/6-311+G(d)//HF/6-311+G(d)<sup>b</sup> energies.

|                               | isomer              | Sym                 | $\Delta E_{\text{def}}$ | $\Delta E_{\text{int}}$ | $\Delta E_{\text{comp}}$ | $\Delta E_{\text{comp}}+\text{ZPC}$ | $\Delta E$ |
|-------------------------------|---------------------|---------------------|-------------------------|-------------------------|--------------------------|-------------------------------------|------------|
| $\text{F}^-+\text{Ti-T}_8$    | (a) axial           | $\text{C}_1$        | 35.9                    | -135.1                  | -99.1                    | -98.4                               | 0.0[0.0]   |
|                               |                     | (Cs)                | (34.7)                  | (-133.4)                | (-98.7)                  |                                     | (0.0)      |
|                               | (b) equatorial      | Cs                  | 55.6                    | -150.6                  | -95.0                    | -94.8                               | 3.6        |
|                               |                     | (Cs)                | (50.6)                  | (-145.0)                | (-94.4)                  |                                     | (4.3)      |
|                               | (c) neighbor bridge | $\text{C}_1$        | 56.3                    | -151.4                  | -95.1                    | -93.7                               | 4.7        |
|                               |                     | ( $\text{C}_1$ )    | (52.2)                  | (-146.3)                | (-94.1)                  |                                     | (4.6)      |
|                               | (d) diagonal bridge | $\text{C}_{2v}$     | 63.9                    | -149.5                  | -85.6                    | -84.7                               | 13.7       |
|                               |                     | ( $\text{C}_{2v}$ ) | (60.4)                  | (-145.7)                | (-85.3)                  |                                     | (13.4)     |
|                               | (e) endo            | $\text{C}_1$        | 23.2                    | -125.3                  | -102.1                   | -101.6                              | -3.2[-7.6] |
|                               |                     | (Cs)                | (14.7)                  | (-115.8)                | (-101.2)                 |                                     | (-2.5)     |
| $\text{F}^-+\text{Ti-T}_{10}$ | (a) axial           | Cs                  | 36.2                    | -137.9                  | -101.7                   | -100.8                              | 0.0        |
|                               |                     | (Cs)                | (35.1)                  | (-136.2)                | (-101.1)                 |                                     | (0.0)      |
|                               | (b) equatorial      | -                   | -                       | -                       | -                        | -                                   | -          |
|                               |                     | (Cs)                | (54.1)                  | (-150.4)                | (-96.3)                  |                                     | (4.8)      |
|                               | (c) endo            | Cs                  | 27.1                    | -128.2                  | -101.1                   | -100.5                              | 0.3        |
|                               |                     | (Cs)                | (20.9)                  | (-121.2)                | (-100.3)                 |                                     | (0.8)      |

<sup>a</sup>The values in italics are in square brackets.

<sup>b</sup>The values are in parentheses.

**TABLE S2:** The B3LYP/6-311+G(d) and HF/6-311+G(d) <sup>a</sup> geometrical parameters (Å) and the B3LYP/6-311+G(d)+ZPC and MP2/6-311+G(d) <sup>b</sup> relative energies (kcal/mol) of three isomers of F<sup>-</sup> + Ti-T<sub>n</sub>(n=8 and 10) and FHTi(OH)<sub>3</sub><sup>-</sup>.

|                                          |                   | sym                     | r(F-Ti)        | r(H-Ti)        | r(O-Ti) <sub>1</sub> | r(O-Ti) <sub>2</sub> | r(O-Ti) <sub>3</sub> | r(F-Ti) <sub>ave</sub> <sup>c</sup> | ΔE                |
|------------------------------------------|-------------------|-------------------------|----------------|----------------|----------------------|----------------------|----------------------|-------------------------------------|-------------------|
| <b>FHTi(OH)<sub>3</sub><sup>-</sup></b>  | <b>axial</b>      | <b>C<sub>1</sub></b>    | <b>1.930</b>   | <b>1.730</b>   | <b>1.875</b>         | <b>1.908</b>         | <b>1.869</b>         |                                     | <b>0.0</b>        |
|                                          |                   | <b>(C<sub>1</sub>)</b>  | <b>(1.914)</b> | <b>(1.715)</b> | <b>(1.858)</b>       | <b>(1.884)</b>       | <b>(1.862)</b>       |                                     | <b>(0.0)</b>      |
|                                          | <b>equatorial</b> | <b>-</b>                | <b>-</b>       | <b>-</b>       | <b>-</b>             | <b>-</b>             | <b>-</b>             |                                     | <b>-</b>          |
|                                          |                   | <b>(C<sub>1</sub>)</b>  | <b>(1.811)</b> | <b>(1.833)</b> | <b>(1.886)</b>       | <b>(1.846)</b>       | <b>(1.881)</b>       |                                     | <b>(3.8)</b>      |
|                                          | <b>endo</b>       | <b>C<sub>3v</sub></b>   | <b>1.864</b>   | <b>1.875</b>   | <b>1.870</b>         | <b>1.870</b>         | <b>1.870</b>         |                                     | <b>1.2</b>        |
|                                          |                   | <b>(C<sub>3v</sub>)</b> | <b>(1.803)</b> | <b>(1.881)</b> | <b>(1.848)</b>       | <b>(1.848)</b>       | <b>(1.848)</b>       |                                     | <b>(2.5)</b>      |
| <b>F<sup>-</sup>+(Ti-T<sub>8</sub>)</b>  | <b>axial</b>      | <b>C<sub>1</sub></b>    | <b>1.814</b>   | <b>1.690</b>   | <b>1.884</b>         | <b>1.885</b>         | <b>1.986</b>         |                                     | <b>0.0[0.0]</b>   |
|                                          |                   | <b>(Cs)</b>             | <b>(1.813)</b> | <b>(1.676)</b> | <b>(1.876)</b>       | <b>(1.876)</b>       | <b>(1.968)</b>       |                                     | <b>(0.0)</b>      |
|                                          | <b>equatorial</b> | <b>Cs</b>               | <b>1.788</b>   | <b>1.717</b>   | <b>1.862</b>         | <b>1.862</b>         | <b>2.088</b>         |                                     | <b>3.6</b>        |
|                                          |                   | <b>(Cs)</b>             | <b>(1.789)</b> | <b>(1.706)</b> | <b>(1.854)</b>       | <b>(1.854)</b>       | <b>(2.052)</b>       |                                     | <b>(4.3)</b>      |
|                                          | <b>endo</b>       | <b>C<sub>1</sub></b>    | <b>2.321</b>   | <b>1.708</b>   | <b>1.837</b>         | <b>1.838</b>         | <b>1.821</b>         | <b>3.068</b>                        | <b>-3.2[-7.6]</b> |
|                                          |                   | <b>(Cs)</b>             | <b>(2.219)</b> | <b>(1.695)</b> | <b>(1.827)</b>       | <b>(1.827)</b>       | <b>(1.827)</b>       | <b>(3.076)</b>                      | <b>(-2.5)</b>     |
| <b>F<sup>-</sup>+(Ti-T<sub>10</sub>)</b> | <b>axial</b>      | <b>Cs</b>               | <b>1.812</b>   | <b>1.685</b>   | <b>1.886</b>         | <b>1.886</b>         | <b>1.986</b>         |                                     | <b>0.0</b>        |
|                                          |                   | <b>(Cs)</b>             | <b>(1.812)</b> | <b>(1.669)</b> | <b>(1.878)</b>       | <b>(1.878)</b>       | <b>(1.969)</b>       |                                     | <b>(0.0)</b>      |
|                                          | <b>equatorial</b> | <b>-</b>                | <b>-</b>       | <b>-</b>       | <b>-</b>             | <b>-</b>             | <b>-</b>             |                                     | <b>-</b>          |
|                                          |                   | <b>(Cs)</b>             | <b>(1.783)</b> | <b>(1.704)</b> | <b>(1.856)</b>       | <b>(1.856)</b>       | <b>(2.052)</b>       |                                     | <b>(4.8)</b>      |
|                                          | <b>endo</b>       | <b>Cs</b>               | <b>2.229</b>   | <b>1.708</b>   | <b>1.849</b>         | <b>1.849</b>         | <b>1.818</b>         | <b>3.696</b>                        | <b>0.3</b>        |
|                                          |                   | <b>(Cs)</b>             | <b>(2.229)</b> | <b>(1.692)</b> | <b>(1.837)</b>       | <b>(1.837)</b>       | <b>(1.804)</b>       | <b>(3.695)</b>                      | <b>(0.8)</b>      |

<sup>a</sup>The HF/6-311+G(d) values are in parentheses.

<sup>b</sup>The values in italics are in square brackets.

<sup>c</sup>The averaged distance between F<sup>-</sup> and all skeletal Ti atoms of the cages.
